# Supplementary material
Source: PubMed Central journal article supplement (PMC8063780)

**Supplemental file: Risk of bias of included studies (NOS) Study.**

| Study                         | Newcastle–Ottawa Scale |               |          | Overall risk of bias |
|-------------------------------|------------------------|---------------|----------|----------------------|
|                               | Selection              | Comparability | Exposure |                      |
| Huang et al., Jan 2020        | **                     | *             | **       | High                 |
| Guan et al., Feb 2020         | ***                    | *             | *        | Low                  |
| Wang et al., Feb 2020         | ***                    | *             | **       | Moderate             |
| Yang et al., Feb 2020         | **                     | *             | **       | High                 |
| Zhang et al., Feb 2020        | ***                    | *             | **       | Moderate             |
| Mo et al., Mar 2020           | **                     | *             | *        | High                 |
| Ruan et al., Mar 2020         | ***                    | *             | **       | Moderate             |
| Wang et al., Mar 2020         | ***                    | *             | *        | Low                  |
| Zhou et al., Mar 2020         | **                     | *             | **       | High                 |
| Chen et al., Mar 2020         | ***                    | *             | **       | Moderate             |
| Qin et al., Mar 2020          | **                     | *             | *        | High                 |
| Zhao et al., Apr 2020         | ****                   | *             | *        | Low                  |
| Goyal et al., Apr 2020        | **                     | *             | *        | Low                  |
| Paranjpe et al., Apr 2020     | ***                    | *             | **       | Moderate             |
| Wan et al., Apr 2020          | ***                    | *             | **       | Moderate             |
| Zheng et al., May 2020        | ***                    | *             | **       | Moderate             |
| Hong et al., May 2020         | ***                    | *             | *        | Low                  |
| Nowak et al., May 2020        | **                     | *             | **       | High                 |
| Marcello et al., Jun 2020     | **                     | *             | *        | High                 |
| Mikami et al., Jun 2020       | ****                   | *             | *        | Low                  |
| Shahriarirad et al., Jun 2020 | ***                    | *             | **       | Moderate             |
| Wang et al., Jun 2020         | **                     | *             | *        | High                 |
| Zhang et al., Jun 2020        | ***                    | *             | *        | Low                  |
| Suleyman et al., Jun 2020     | **                     | *             | *        | High                 |
| Wang et al., Jun 2020         | ***                    | *             | **       | Moderate             |
| Li et al., Jul 2020           | ***                    | *             | **       | Moderate             |
| Xu et al., Jul 2020           | ***                    | *             | *        | Low                  |
| Ferguson et al., Aug 2020     | **                     | *             | *        | Low                  |
| Yang et al., Aug 2020         | **                     | *             | **       | High                 |

# Supplemental file: Funnel Plots and Forest plot (sensitivity analysis).

## 1) Comorbid Chronic Kidney Disease (CKD)

### Funnel Plot

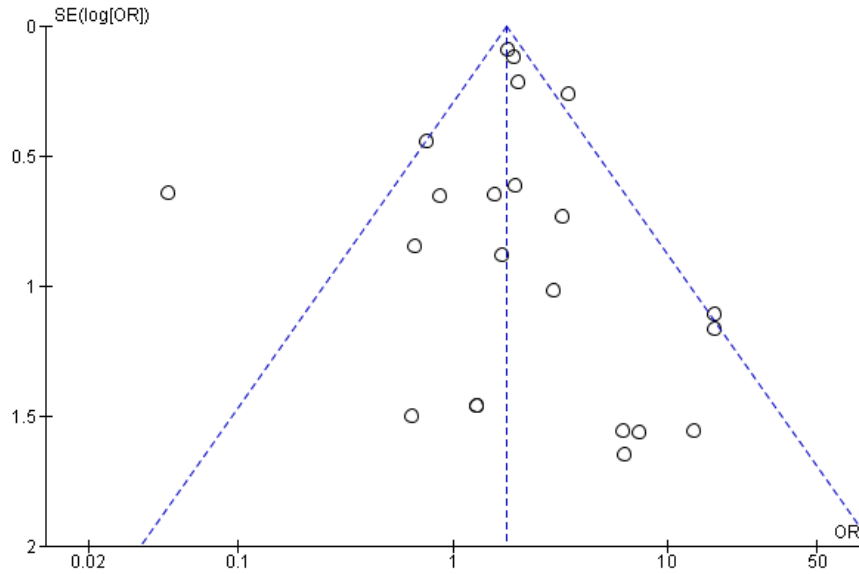

### Forest plot of CKD and COVID-19 severity (Sensitivity)

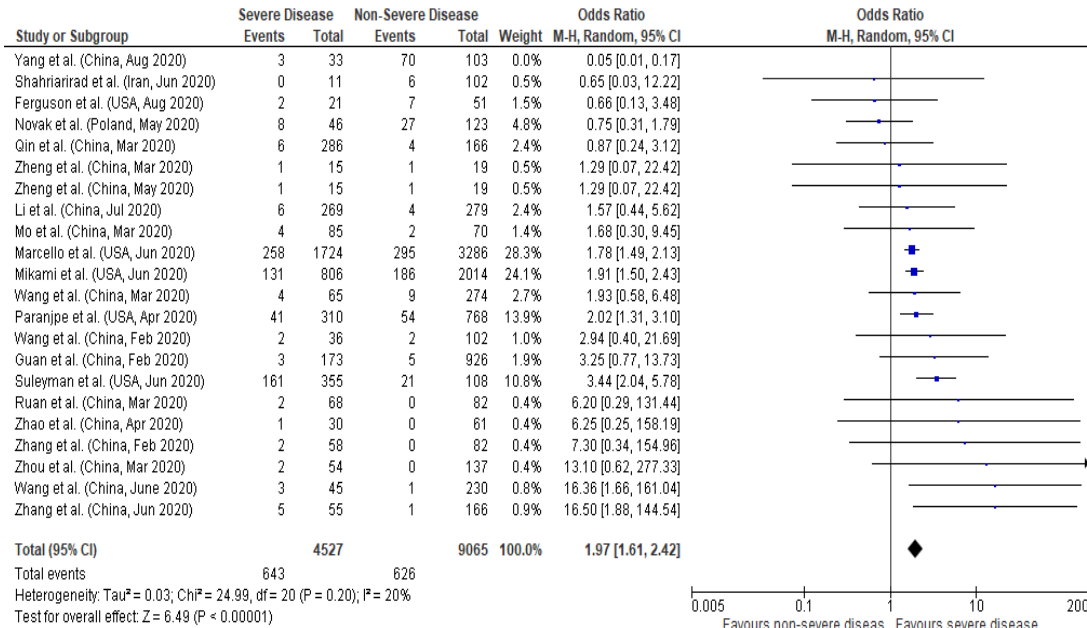

## 2) Acute Kidney Injury (AKI)

### Funnel Plot

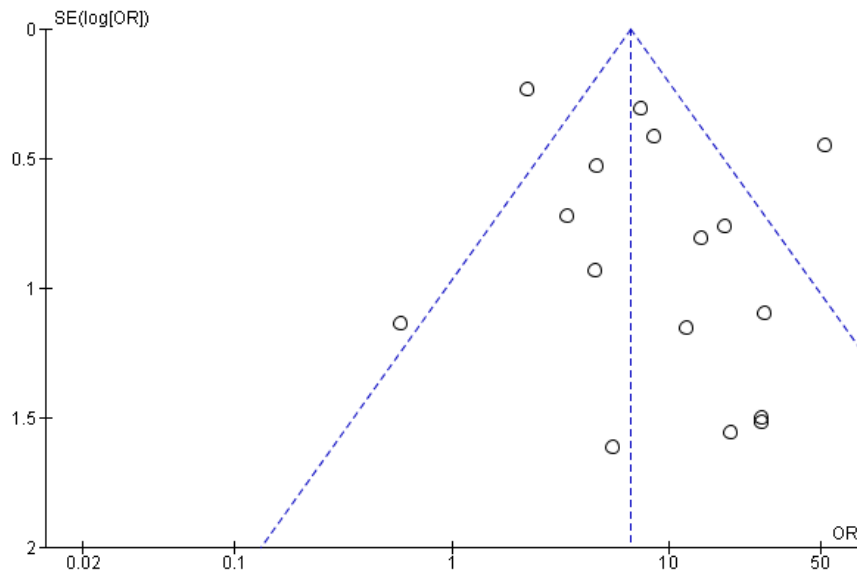

### Forest plot of CKD and COVID-19 severity (Sensitivity analysis).

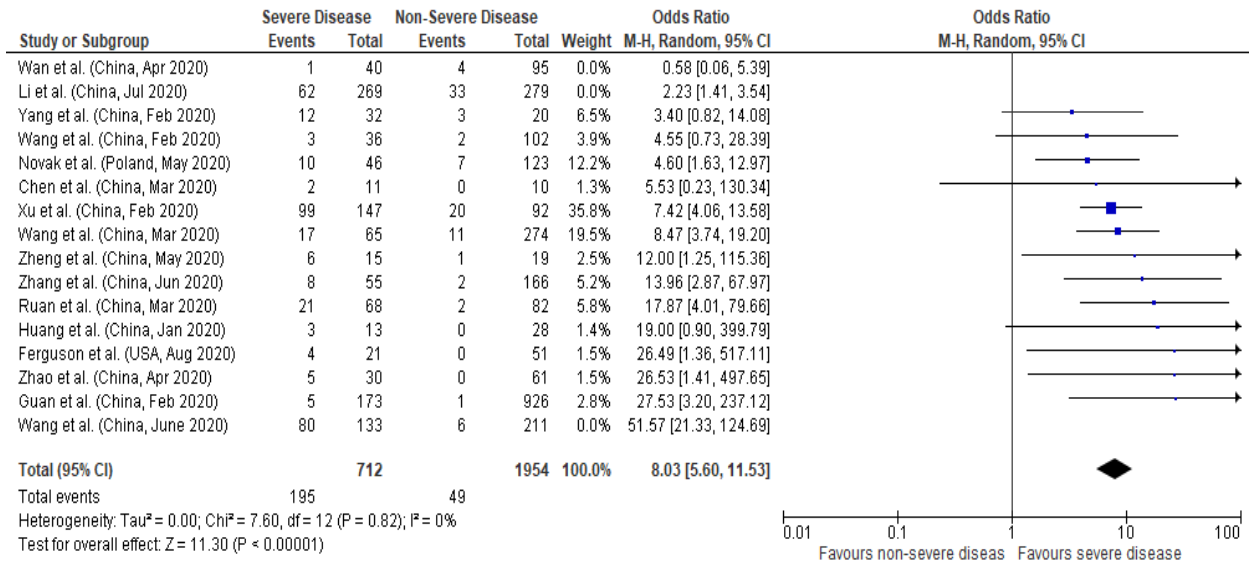

Supplement: 10238_2021_715_MOESM1_ESM.pdf [file 10238_2021_715_MOESM1_ESM.pdf]
